# Supplementary material for: Knowledge, attitudes, behaviors, and serological status related to Chagas disease among Latin American migrants in Germany: A cross-sectional study in six German cities
Source: PubMed Central journal article supplement (PMC9905718; doi:10.3389/fcimb.2022.1047281), 2023-01-25
Supplement: DataSheet_1.pdf [file DataSheet_1.pdf]

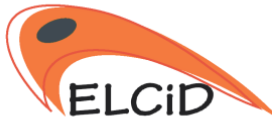

Número de participante (llenado por el responsable del estudio)

ELCiD (Erkennung und Lenkung von Chagas-Patienten in Deutschland (ELCiD)/  
Querschnittstudie)

## Proyecto alemán de Chagas

### Cuestionario sobre la enfermedad de Chagas en Alemania

Estimado(a) Participante,

Uno de los objetivos del estudio de Chagas, es mejorar la atención médica en Alemania para inmigrantes o personas con riesgo para la enfermedad de Chagas. Para esto requerimos información acerca de su persona y de los conocimientos que Usted tiene sobre el Chagas. En el contexto de nuestra oferta de asesoramiento y de la prueba de Chagas, le solicitamos contestar algunas preguntas.

Su información se mantendrá estrictamente confidencial y estrictamente por separado de su información personal (por ejemplo, nombre, fecha de nacimiento). La evaluación se realiza exclusivamente de manera estadística. De esta manera ninguna conclusión sobre datos y personas individuales será posible.

¡Le agradecemos su ayuda!

1. Su sexo es  masculino  femenino

2. Año de nacimiento \_\_\_\_\_

3. País de nacimiento: \_\_\_\_\_ 4. Ciudad de nacimiento: \_\_\_\_\_

5. Nacionalidad: \_\_\_\_\_ 6. Idioma materno: \_\_\_\_\_

7. ¿En qué año llegó a Europa? \_\_\_\_\_

8. ¿Cual fue la razón por su traslado/ mudanza a Europa?

trabajo  estudios  matrimonio/pareja  familia vive en Europa  
 otras razones, que son (9) \_\_\_\_\_

10. ¿En qué país pasó la mayor parte de su infancia? \_\_\_\_\_

11. ¿En qué ciudad pasó la mayor parte de su infancia? \_\_\_\_\_

12. ¿En qué país/ ciudad fue su último domicilio antes de trasladarse a Europa?

país: \_\_\_\_\_ ciudad/región (13) : \_\_\_\_\_

14. ¿En qué lugar de Latinoamérica pasó la mayor parte de su infancia?

- En la ciudad (más de 10.000 habitantes)
- En el campo (menos de 10.000 habitantes)

15. Su último domicilio en Latinoamérica fue....

- En la ciudad (más de 10.000 habitantes)
- En el campo (menos de 10.000 habitantes)

16. ¿De qué material fue construida la casa en que pasó su infancia?

- piedra/concreto/ cemento    adobe/ barro    madera
- otros materiales de construcción

17. ¿De qué material fue construida la casa de su último domicilio en Latinoamérica?

- piedra/concreto/ cemento    adobe/ barro    madera
- otros materiales de construcción

18. ¿Ha visto alguna vez en su domicilio un insecto llamado chinche (o vinchuca, barbeiro, chirimacha, pito, chichâ...)?

- sí                                       no

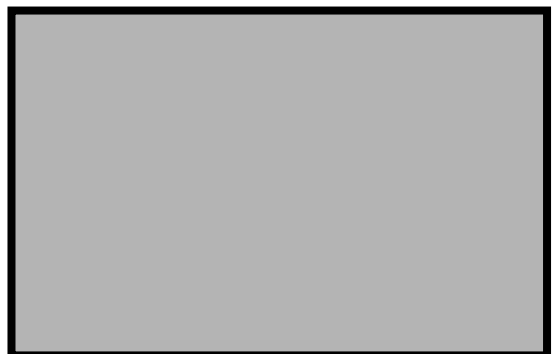

19. ¿Cuántos hijos tiene? \_\_\_\_\_

20. ¿Cuál es su máximo nivel de educación?

- Ningún título escolar    primaria    secundaria    formación técnica
- formación universitaria

**21. ¿Cuál es el máximo nivel de educación de sus padres?**

Ningún título escolar  primaria  secundaria  formación técnica

formación universitaria

**22. ¿Ha escuchado de la enfermedad de Chagas en su país?**

Sí  no

**23. ¿Cuáles son las molestias que la enfermedad de Chagas puede causar?**

**Por favor mencione las tres más frecuentes**

1. \_\_\_\_\_

2. \_\_\_\_\_

3. \_\_\_\_\_

**24. ¿Cómo se transmite la enfermedad de Chagas?**

**(por favor marque todas las maneras de transmisión que conoce)**

Por un chinche (vinchuca)

Por beber jugo de caña

Por relaciones sexuales

Durante el nacimiento de la madre al bebé

Por una transfusión de sangre

Por contacto físico con personas infectadas

Por una picadura de zancudo

No conozco las maneras de transmisión

Por un trasplante de órganos

**25. ¿Hay personas que se sienten bien aunque están infectadas con la enfermedad de Chagas?**

sí  no  no sé

**26. ¿Alguien de su familia cercana padece/padeció de la enfermedad de Chagas?  
(padres, abuelos, hermanos, niños)**

Sí, es mi (27) \_\_\_\_\_  no  no sé

**28. ¿Conoce a personas de su lugar de residencia en Latinoamérica con la enfermedad de Chagas?**

sí  no

**29. ¿Podría imaginarse donar sangre en el futuro?**

sí  no  no sé

**30. ¿Ha donado sangre alguna vez?**

sí, en el siguiente país (31) \_\_\_\_\_ en el año (32) \_\_\_\_\_

no

**33. ¿Ha recibido una transfusión de sangre alguna vez?**

sí, en el siguiente país (34) \_\_\_\_\_ en el año (35) \_\_\_\_\_

no

**36. ¿Podría imaginarse donar sus órganos después de su muerte?**

sí  no  no sé

**37. ¿Le han hecho una prueba de Chagas alguna vez?**

Sí, en el año (38) \_\_\_\_\_

(39) el resultado dio  positivo  negativo

no

**40. Si el resultado fue positivo, ¿recibió algún tratamiento para la enfermedad de Chagas?**

sí, en el siguiente país (41): \_\_\_\_\_ en el año (42) \_\_\_\_\_  
con el siguiente medicamento (43) \_\_\_\_\_

no

**44. Si ha padecido de la enfermedad de Chagas alguna vez, ¿cuáles molestias ha tenido/tiene?**

1. \_\_\_\_\_

2. \_\_\_\_\_

3. \_\_\_\_\_

**45. ¿Padece de una enfermedad al corazón?**

sí

no

**46. Si padece de una enfermedad al corazón, ¿cuáles molestias tiene?**

1. \_\_\_\_\_

2. \_\_\_\_\_

3. \_\_\_\_\_

**47. Si padece de una enfermedad al corazón, ¿cuál es el nombre de su enfermedad?**

1. \_\_\_\_\_

2. \_\_\_\_\_

3. \_\_\_\_\_

**48. ¿Padece de una enfermedad al tracto digestivo (estómago, esófago, intestino)?**

sí

no

**49. Si padece de una enfermedad al tracto digestivo, ¿cuáles molestias tiene?**

1. \_\_\_\_\_

2. \_\_\_\_\_

3. \_\_\_\_\_

**50. Si padece de una enfermedad al tracto digestivo, ¿cuál es el nombre de su enfermedad?**

1. \_\_\_\_\_

2. \_\_\_\_\_

3. \_\_\_\_\_

**51. ¿Usted personalmente siente que su atención médica en Alemania es suficiente?**

sí, ya que no tengo problemas con el acceso a la atención médica

sí, pero tengo algunos problemas para acudir a servicios médicos

no, porque tengo grandes dificultades para obtener servicios médicos

**52. ¿Qué seguro médico tiene usted en Alemania?**

seguro alemán obligatorio o privado

seguro para estudiantes

seguro extranjero

no tengo seguro médico
