# Supplementary material for: Knowledge, attitudes, behaviors, and serological status related to Chagas disease among Latin American migrants in Germany: A cross-sectional study in six German cities
Source: PubMed Central journal article supplement (PMC9905718; doi:10.3389/fcimb.2022.1047281), 2023-01-25
Supplement: DataSheet_2.pdf [file DataSheet_2.pdf]

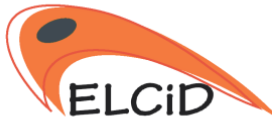

Número de participante (llenado  
por el responsable del estudio)

## EICiD – Proyecto alemán de Chagas Cuestionario sobre la enfermedad de Chagas en Alemania

Prezado(a) Participante,

Um dos objetivos do estudo do Mal de Chagas é melhorar a atenção médica na Alemanha para imigrantes ou pessoas com risco de adquirir essa enfermidade. Para isso gostaríamos de obter algumas informações pessoais bem como sobre o conhecimento que tem sobre o Mal de Chagas. Nesse contexto da nossa proposta de assessoramento e de testes do Mal de Chagas, lhe pedimos para responder algumas perguntas.

Essas informações serão confidenciais e analisadas separadamente dos dados pessoais (por exemplo nome, data de nascimento). A avaliação será realizada exclusivamente para efeito de estatística. Dessa maneira não haverá possibilidade de se ligar os dados às pessoas.

Desde já agradecemos a sua ajuda!

1. Sexo  masculino  feminino

2. Ano de nascimento \_\_\_\_\_

3. País em que nasceu: \_\_\_\_\_ 4. Cidade em que nasceu:  
\_\_\_\_\_

5. Nacionalidade: \_\_\_\_\_ 6. Idioma materno: \_\_\_\_\_

7. Em que ano chegou na Europa? \_\_\_\_\_

8. Qual a razão de sua vinda/mudança para a Europa?

trabalho  estudos  matrimônio/ligação afetiva  família  
vive na Europa

outras razões, que seriam (9) \_\_\_\_\_

10. Em que país passou a maior parte de sua infância? \_\_\_\_\_

11. Em que cidade passou a maior parte de sua infância? \_\_\_\_\_

12. Qual foi seu último domicílio antes de mudar para a Europa?

país: \_\_\_\_\_ cidade/região (13) : \_\_\_\_\_

14. Em que lugar da América Latina passou a maior parte da sua infância?

- Em uma cidade (mais de 10.000 habitantes)
- No campo (menos de 10.000 habitantes)

15. Seu último domicílio na América Latina foi....

- Na cidade (mais de 10.000 habitantes)
- No campo (menos de 10.000 habitantes)

16. De que material era construída a casa onde passou a maior parte de sua infância?

- pedra/concreto/cimento  adobe/ barro  madeira
- outros materiais

17. De que material foi construída a casa onde morou por último antes de sua mudança para Europa?

- pedra/concreto/cimento  adobe/ barro  madeira
- outros materiais

18. Alguma vez viu em sua casa um inseto chamado barbeiro (ou chinche, vinchuca, , chirimacha, pito, chichâ...)?

- sim  não

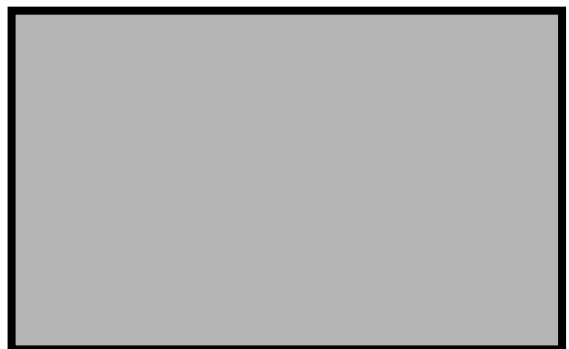

19. Quantos filhos tem? \_\_\_\_\_

20. Escolaridade?

- nenhuma  primário  segundo-grau  formação técnica
- formação universitária

**21. Qual o nível de escolaridade dos seus pais?**

- nenhum  elementar  segundo grau  formacao técnica
- formacao universitária

**22. Tem conhecimento do Mal de Chagas em seu país?**

- sim  nao

**23. Quais sao as moléstias que o Mal de Chagas pode causar?  
Por favor mencione as três mais frequentes:**

1. \_\_\_\_\_
2. \_\_\_\_\_
3. \_\_\_\_\_

**24. Como se transmite o Mal de Chagas?  
(por favor marque todas as maneiras de transmissao que conhece)**

- Por um barbeiro (vinchuca)  Por beber suco de cana
- Por relacoes sexuais  Ao bebê através da mae durante o parto
- Por uma transfusao de sangue  Por contato físico com pessoas infectadas
- Por picada de mosquitos  Nao conhececo as formas de transmissao
- Por um transplante de órgãos

**25. Existem pessoas que se sentem bem apesar de estarem infectadas com o Mal de Chagas?**

- sim  nao  nao sei

**26. Alguém da sua familia direta tem ou teve o Mal de Chagas?**

- Sim, é meu(minha) (27) \_\_\_\_\_  nao  nao sei

**28. Conhece alguém no lugar onde morou na América Latina que tem ou teve o Mal de Chagas?**

- sim  nao

**29. Poderia se imaginar a doar sangue no futuro?**

sim  nao  nao sei

**30. Já doou sangue?**

sim, no seguinte país (31) \_\_\_\_\_ no ano de (32)

\_\_\_\_\_

nao

**33. Já recebeu uma transfusão de sangue?**

sim, no seguinte país (34) \_\_\_\_\_ no ano de (35)

\_\_\_\_\_

nao

**36. Pode se imaginar sendo doador de órgãos após sua morte?**

sim  nao  nao sei

**37. Já fez um teste para determinar o Mal de Chagas?**

Sim, no ano (38) \_\_\_\_\_

(39) o resultado foi  positivo  negativo

nao

**40. Caso o resultado tenha sido positivo, você recebeu algum tratamento para a doença?**

sim, no seguinte país (41): \_\_\_\_\_ no ano de (42) \_\_\_\_\_

com o seguinte medicamento (43) \_\_\_\_\_

nao

**44. Se você contraiu o Mal de Chagas, quais os sintomas você teve?**

1. \_\_\_\_\_

2. \_\_\_\_\_

3. \_\_\_\_\_

**45. Tem alguma doença de coração?**

sim

não

**46. Se tem alguma doença de coração, quais seriam os sintomas?**

1. \_\_\_\_\_

2. \_\_\_\_\_

3. \_\_\_\_\_

**47. Se tem uma doença do coração, qual seria o nome dessa enfermidade?**

1. \_\_\_\_\_

2. \_\_\_\_\_

3. \_\_\_\_\_

**48. Sofre de alguma doença do sistema digestivo (estômago, esôfago, intestino)?**

sim

não

**49. Se sofre de uma doença do sistema digestivo, quais seriam os sintomas?**

1. \_\_\_\_\_

2. \_\_\_\_\_

3. \_\_\_\_\_

**50. Se sofre de uma doença do sistema digestivo, qual seria o nome dessa doença?**

1. \_\_\_\_\_

2. \_\_\_\_\_

3. \_\_\_\_\_

**51. Você acha que o atendimento médico na Alemanha é suficiente?**

sim, já que não tenho problemas no acesso ao atendimento médico

sim, mas tenho alguns problemas para acessar alguns serviços médicos

nao, porque tenho muita dificuldade em receber ao atendimento médico

**52. Qual o seguro saúde tem na Alemanha?**

seguro alemao obrigatório ou privado

seguro médico para estudantes

seguro médico para estrangeiros

nao tenho seguro médico
